# Supplementary material
Source: publisher site journal article supplement (https://www.dovepress.com/article/394017)
Supplement: Supplementary file 1 [file get_supplementary_file.php]

| No | age (year) | Gender | Onset (hours) | NIHSS admission | NIHSS discharge | Risk factor                                              | Hypertension | Diabetes Mellitus | Dyslipidemia | Smoking | hyperuricemia | A fib | Myocardial infarction | CHF | prior stroke | Hypercoagulation | Covid-19 status | CT scan variable |                            |                | Variable CT Scan | Length of stay | Fibrinogen | D-Dimer | TOAST                           |
|----|------------|--------|---------------|-----------------|-----------------|----------------------------------------------------------|--------------|-------------------|--------------|---------|---------------|-------|-----------------------|-----|--------------|------------------|-----------------|------------------|----------------------------|----------------|------------------|----------------|------------|---------|---------------------------------|
|    |            |        |               |                 |                 |                                                          |              |                   |              |         |               |       |                       |     |              |                  |                 | Cortical         | Subcortical Supratentorial | Infratentorial |                  |                |            |         |                                 |
| 1  | 56         | L      | 7,0           | 8               | 5               | Hiptertensi, dislipidemia, hiperuricemia, hiperkoagulasi | 1            | 2                 | 1            | 2       | 1             | 2     | 2                     | 2   | 1            | 1                | 1               | 1                | 2                          | 2              | 1                | 12             | 438        | 20,86   | Stroke of Undetermined Etiology |
| 2  | 50         | L      | 48,0          | 8               | 4               | Hiptertensi, dislipidemia, DM, smoking                   | 1            | 1                 | 1            | 1       | 2             | 2     | 2                     | 2   | 2            | 2                | 2               | 1                | 2                          | 2              | 1                | 7              | 0          | 0,00    | Large-artery Atherosclerosis    |
| 3  | 54         | P      | 96,0          | 4               | 4               | Rheumatic Heart Disease dislipidemia                     | 2            | 2                 | 1            | 2       | 2             | 2     | 2                     | 2   | 1            | 2                | 2               | 1                | 2                          | 2              | 1                | 7              | 0          | 0,00    | cardioembolism                  |
| 4  | 60         | P      | 120,0         | 11              | N/A             | Hypertension, stroke sebelumnya                          | 1            | 2                 | 2            | 2       | 2             | 2     | 2                     | 2   | 1            | 1                | 2               | 2                | 1                          | 2              | 2                | 3              | 356        | 6,84    | Stroke of Undeter               |





|    |    |   |      |    |     |                                                              |   |   |   |   |   |   |   |   |   |   |   |   |   |   |   |    |   |      |                              |
|----|----|---|------|----|-----|--------------------------------------------------------------|---|---|---|---|---|---|---|---|---|---|---|---|---|---|---|----|---|------|------------------------------|
| 14 | 52 | P | 24,0 | 4  | N/A | Hypertension, DMT2, Dislipidemia                             | 1 | 1 | 1 | 2 | 2 | 2 | 2 | 2 | 1 | 2 | 2 | 2 | 1 | 1 | 2 | 8  | 0 | 0,00 | Small-artery occlusion       |
| 15 | 56 | P | 24,0 | 9  | 7   | Hypertension                                                 | 1 | 2 | 2 | 2 | 2 | 2 | 2 | 2 | 1 | 2 | 2 | 2 | 1 | 2 | 2 | 6  | 0 | 0,00 | Large-artery Atherosclerosis |
| 16 | 40 | P | 3,0  | 9  | 3   | Hypertension, Smoking, Decompenstio Cordis & AV Blok grade I | 1 | 2 | 2 | 1 | 2 | 2 | 2 | 1 | 2 | 2 | 2 | 1 | 2 | 2 | 1 | 12 | 0 | 0,00 | cardioembolism               |
| 17 | 70 | P | 12,0 | 17 | N/A | Hypertension, CAD, dislipidemia                              | 1 | 2 | 1 | 2 | 2 | 2 | 1 | 2 | 1 | 2 | 2 | 1 | 2 | 2 | 1 | 9  | 0 | 0,00 | cardioembolism               |

|    |    |   |      |    |    |                                     |   |   |   |   |   |   |   |   |   |   |   |   |   |   |   |    |   |      |                              |                                 |
|----|----|---|------|----|----|-------------------------------------|---|---|---|---|---|---|---|---|---|---|---|---|---|---|---|----|---|------|------------------------------|---------------------------------|
| 18 | 88 | P | 6,0  | 17 | 17 | Hypertension                        | 1 | 2 | 2 | 2 | 2 | 2 | 2 | 2 | 2 | 1 | 2 | 2 | 2 | 2 | 1 | 3  | 6 | 0    | 0,00                         | Stroke of Undetermined Etiology |
| 19 | 48 | L | 96,0 | 15 | 14 | Hypertension, dislipidemia, smoking | 1 | 2 | 1 | 1 | 2 | 2 | 2 | 2 | 2 | 2 | 2 | 2 | 1 | 2 | 2 | 7  | 0 | 0,00 | Large-artery Atherosclerosis |                                 |
| 20 | 55 | P | 4,0  | 4  | 3  | Hypertension, DMT2, Dislipidemia    | 1 | 1 | 1 | 2 | 2 | 2 | 2 | 2 | 2 | 2 | 2 | 2 | 2 | 1 | 3 | 10 | 0 | 0,00 | Large-artery Atherosclerosis |                                 |
| 21 | 54 | L | 3,0  | 16 | 4  | Hypertension smoking                | 1 | 2 | 2 | 1 | 2 | 2 | 2 | 2 | 1 | 2 | 2 | 2 | 1 | 2 | 2 | 7  | 0 | 0,00 | Large-artery Atherosclerosis |                                 |

|        |    |   |     |   |     |                                                                 |   |   |   |   |   |   |   |   |   |   |   |   |   |   |   |    |   |          |                               |
|--------|----|---|-----|---|-----|-----------------------------------------------------------------|---|---|---|---|---|---|---|---|---|---|---|---|---|---|---|----|---|----------|-------------------------------|
| 2<br>2 | 55 | L | 2,0 | 7 | 3   | Hypertension,<br>DMT2                                           | 1 | 1 | 2 | 2 | 2 | 2 | 2 | 2 | 2 | 2 | 2 | 2 | 1 | 2 | 2 | 7  | 0 | 0,0<br>0 | Small-<br>artery<br>occlusion |
| 2<br>3 | 38 | P | 5,0 | 8 | N/A | LV<br>thrombus<br>, LV<br>hypokinetic,<br>Hypertension,<br>DMT2 | 1 | 1 | 2 | 2 | 2 | 2 | 2 | 1 | 1 | 2 | 2 | 1 | 2 | 2 | 1 | 10 | 0 | 0,0<br>0 | cardioembolism                |

|    |    |   |      |    |    |                                     |   |   |   |   |   |   |   |   |   |   |   |   |   |   |    |    |      |                              |                              |
|----|----|---|------|----|----|-------------------------------------|---|---|---|---|---|---|---|---|---|---|---|---|---|---|----|----|------|------------------------------|------------------------------|
| 24 | 55 | P | 6,0  | 3  | 2  | Hypertension, DMT2, Dislipidemia    | 1 | 1 | 1 | 2 | 2 | 2 | 2 | 2 | 2 | 2 | 1 | 2 | 2 | 1 | 8  | 0  | 0,00 | Large-artery Atherosclerosis |                              |
| 25 | 55 | L | 10,0 | 15 | 11 | Hypertension, Dislipidemia          | 1 | 2 | 1 | 2 | 2 | 2 | 2 | 2 | 1 | 2 | 2 | 1 | 2 | 2 | 1  | 13 | 0    | 0,00                         | Large-artery Atherosclerosis |
| 26 | 62 | L | 6,0  | 3  | 0  | Hypertension, dislipidemia, smoking | 1 | 2 | 1 | 1 | 2 | 2 | 2 | 2 | 2 | 2 | 1 | 2 | 1 | 2 | 2  | 28 | 297  | 0,44                         | Small-artery occlusion       |
| 27 | 57 | P | 48,0 | 7  | 4  | Hypertension, dislipidemia          | 1 | 2 | 1 | 2 | 2 | 2 | 2 | 2 | 2 | 2 | 1 | 2 | 2 | 1 | 6  | 0  | 0,00 | Large-artery Atherosclerosis |                              |
| 28 | 55 | P | 3,0  | 14 | 4  | susp AF paroxysmal,                 | 1 | 2 | 2 | 2 | 2 | 2 | 2 | 2 | 2 | 2 | 1 | 2 | 2 | 1 | 15 | 0  | 0,00 | Stroke of Undeter            |                              |





|    |    |   |      |    |     |                                                                 |   |   |   |   |   |    |   |   |   |   |   |   |   |   |   |    |     |      |                                 |
|----|----|---|------|----|-----|-----------------------------------------------------------------|---|---|---|---|---|----|---|---|---|---|---|---|---|---|---|----|-----|------|---------------------------------|
| 38 | 57 | P | 6,0  | 16 | 13  | AF RVR,<br>RHD,<br>hiperkoagulasi                               | 2 | 2 | 2 | 2 | 2 | 1  | 2 | 1 | 2 | 1 | 1 | 1 | 2 | 2 | 1 | 11 | 350 | 5,85 | Stroke of Undetermined Etiology |
| 39 | 58 | L | 6,0  | 8  | 16  | Hypertension,<br>Dislipidemia,<br>smoking,<br>stroke sebelumnya | 1 | 2 | 1 | 1 | 2 | 22 | 2 | 2 | 1 | 2 | 2 | 2 | 2 | 1 | 3 | 7  | 0   | 0,00 | Large-artery Atherosclerosis    |
| 40 | 58 | P | 24,0 | 6  | N/A | Hypertension,<br>dislipidemia,<br>stroke                        | 1 | 2 | 1 | 2 | 2 | 2  | 2 | 2 | 1 | 2 | 1 | 1 | 2 | 2 | 1 | 7  | 310 | 0,53 | Large-artery Atherosclerosis    |



|    |    |   |       |    |           |                                          |   |   |   |   |   |   |   |   |   |   |   |   |   |   |   |   |   |      |                        |                        |                                     |
|----|----|---|-------|----|-----------|------------------------------------------|---|---|---|---|---|---|---|---|---|---|---|---|---|---|---|---|---|------|------------------------|------------------------|-------------------------------------|
| 49 | 61 | P | 5,0   | 23 | meninggal | Hiperkoagulasi                           | 2 | 2 | 2 | 2 | 2 | 2 | 2 | 2 | 2 | 2 | 2 | 1 | 1 | 1 | 2 | 2 | 1 | 7    | 427                    | 33,85                  | stroke of other determined etiology |
| 50 | 70 | L | 72,0  | 8  | N/A       | Hypertension, smoking, stroke sebelumnya | 1 | 2 | 2 | 1 | 2 | 2 | 2 | 2 | 1 | 2 | 2 | 2 | 1 | 2 | 2 | 2 | 4 | 0    | 0,00                   | Small-artery occlusion |                                     |
| 51 | 43 | L | 168,0 | 4  | 3         | DMT2, dislipidemia                       | 2 | 1 | 1 | 2 | 2 | 2 | 2 | 2 | 2 | 2 | 2 | 1 | 2 | 2 | 2 | 6 | 0 | 0,00 | Small-artery occlusion |                        |                                     |

|    |    |   |      |    |     |                                                             |   |   |   |   |   |   |   |   |   |   |   |   |   |   |   |    |    |      |                        |                        |
|----|----|---|------|----|-----|-------------------------------------------------------------|---|---|---|---|---|---|---|---|---|---|---|---|---|---|---|----|----|------|------------------------|------------------------|
| 52 | 54 | L | 24,0 | 13 | 9   | hypokinetic at anterolateral, ht dislipidemia LV            | 1 | 2 | 1 | 2 | 2 | 2 | 2 | 2 | 1 | 1 | 2 | 2 | 1 | 2 | 2 | 1  | 11 | 0    | 0,00                   | cardioembolism         |
| 53 | 65 | P | 15,0 | 4  | 4   | hypertension, dislipidemia                                  | 1 | 2 | 1 | 2 | 2 | 2 | 2 | 2 | 2 | 2 | 2 | 2 | 2 | 1 | 2 | 2  | 7  | 0    | 0,00                   | Small-artery occlusion |
| 54 | 59 | L | 8,0  | 5  | 2   | hypertension, High risk OSA, smoking, stroke sebelumnya     | 1 | 2 | 1 | 2 | 2 | 2 | 2 | 2 | 1 | 2 | 2 | 2 | 1 | 2 | 2 | 7  | 0  | 0,00 | Small-artery occlusion |                        |
| 55 | 46 | L | 24,0 | 12 | N/A | Hypertension, PJK, DMT2, regional wall motion abnormalities | 1 | 1 | 2 | 2 | 2 | 2 | 2 | 1 | 1 | 2 | 2 | 1 | 2 | 2 | 1 | 11 | 0  | 0,00 | cardioembolism         |                        |
| 56 | 66 | L | 32,0 | 10 | 0   | Hypertension, dislipide                                     | 1 | 2 | 1 | 1 | 2 | 2 | 2 | 2 | 1 | 2 | 2 | 2 | 1 | 2 | 2 | 7  | 0  | 0,00 | Small-artery occlusion |                        |



|    |    |   |      |    |     |                                                        |   |   |   |   |   |   |   |   |   |   |   |   |   |   |   |   |      |                |                              |
|----|----|---|------|----|-----|--------------------------------------------------------|---|---|---|---|---|---|---|---|---|---|---|---|---|---|---|---|------|----------------|------------------------------|
| 60 | 48 | P | 4,0  | 13 | 13  | Kelainan jantung                                       | 2 | 2 | 2 | 2 | 2 | 2 | 2 | 2 | 2 | 2 | 1 | 2 | 2 | 1 | 7 | 0 | 0,00 | cardioembolism |                              |
| 61 | 54 | L | 12,0 | 12 | N/A | hypertension, smoking, dislipidemia, stroke sebelumnya | 1 | 2 | 1 | 1 | 2 | 2 | 2 | 2 | 1 | 2 | 2 | 1 | 2 | 2 | 1 | 7 | 0    | 0,00           | Large-artery Atherosclerosis |

|        |    |   |           |   |     |                                                        |   |   |   |   |   |   |   |   |   |   |   |   |   |   |   |   |   |          |                                              |
|--------|----|---|-----------|---|-----|--------------------------------------------------------|---|---|---|---|---|---|---|---|---|---|---|---|---|---|---|---|---|----------|----------------------------------------------|
| 6<br>2 | 76 | L | 192<br>,0 | 5 | N/A | Hyperten<br>sion,<br>DMT2,<br>stroke<br>sebelumn<br>ya | 1 | 1 | 2 | 2 | 2 | 2 | 2 | 2 | 1 | 2 | 2 | 2 | 1 | 2 | 2 | 4 | 0 | 0,0<br>0 | Small-<br>artery<br>occlusio<br>n            |
| 6<br>3 | 47 | L | 72,<br>0  | 9 | 9   | dislipide<br>mia,<br>smoking,<br>hiperkoa<br>gulasi    | 2 | 2 | 1 | 1 | 2 | 2 | 2 | 2 | 2 | 1 | 2 | 1 | 2 | 2 | 1 | 6 | 0 | 0,0<br>0 | Stroke<br>of<br>Undeter<br>mined<br>Etiology |

|    |    |   |     |    |   |                                                                      |   |   |   |   |   |   |   |   |   |   |   |   |   |   |   |    |   |      |                                 |
|----|----|---|-----|----|---|----------------------------------------------------------------------|---|---|---|---|---|---|---|---|---|---|---|---|---|---|---|----|---|------|---------------------------------|
| 64 | 20 | L | 6,0 | 10 | 4 | MI, regional wall motion abnormalities, hiperkoagulasi, dislipidemia | 1 | 1 | 1 | 2 | 2 | 2 | 1 | 2 | 2 | 1 | 2 | 1 | 2 | 2 | 1 | 14 | 0 | 0,00 | Stroke of Undetermined Etiology |
| 65 | 49 | L | 1,5 | 8  | 4 | dilated LA                                                           | 2 | 2 | 2 | 2 | 2 | 1 | 2 | 2 | 2 | 2 | 2 | 1 | 2 | 2 | 1 | 7  | 0 | 0,00 | cardioembolism                  |

|    |    |   |      |    |     |                                                                         |   |   |   |   |   |   |   |   |   |   |   |   |   |   |   |    |     |      |                                 |
|----|----|---|------|----|-----|-------------------------------------------------------------------------|---|---|---|---|---|---|---|---|---|---|---|---|---|---|---|----|-----|------|---------------------------------|
| 66 | 62 | L | 6,0  | 11 | N/A | Hypertension                                                            | 1 | 2 | 2 | 2 | 2 | 2 | 2 | 2 | 1 | 2 | 2 | 1 | 2 | 2 | 1 | 2  | 0   | 0,00 | Large-artery Atherosclerosis    |
| 67 | 52 | P | 72,0 | 10 | N/A | Hypertension, DMT2, dislipidemia, hiperkoagulabilitas                   | 1 | 1 | 1 | 2 | 2 | 2 | 2 | 2 | 1 | 1 | 1 | 1 | 2 | 2 | 1 | 12 | 660 | 5,64 | Stroke of Undetermined Etiology |
| 68 | 57 | L | 11,0 | 14 | N/A | Hypertension, dislipidemia, smoking, Regional wall motion abnormalities | 1 | 2 | 1 | 1 | 2 | 2 | 2 | 1 | 1 | 2 | 2 | 1 | 2 | 2 | 1 | 12 | 0   | 0,00 | Stroke of Undetermined Etiology |

|    |    |   |      |    |     |                                                                          |   |   |   |   |    |   |   |   |   |   |   |   |   |   |   |    |     |      |                                 |                                 |
|----|----|---|------|----|-----|--------------------------------------------------------------------------|---|---|---|---|----|---|---|---|---|---|---|---|---|---|---|----|-----|------|---------------------------------|---------------------------------|
| 69 | 54 | L | 24,0 | 15 | N/A | Hypertension, dislipidemia, obesitas, high risk OSA, hiperkolesterolemia | 1 | 2 | 1 | 2 | 2  | 2 | 2 | 2 | 2 | 2 | 1 | 1 | 1 | 2 | 2 | 1  | 9   | 592  | 1,43                            | Stroke of Undetermined Etiology |
| 70 | 57 | L | 7,5  | 4  | 1   | Hypertension, smoking, dislipidemia                                      | 1 | 2 | 1 | 1 | 2  | 2 | 2 | 2 | 2 | 2 | 2 | 2 | 2 | 1 | 2 | 2  | 7   | 0    | 0,00                            | Small-artery occlusion          |
| 71 | 48 | P | 24,0 | 9  | 9   | hypertension, dislipidemia, hiperurisemia                                | 1 | 2 | 1 | 2 | 1  | 2 | 2 | 2 | 2 | 2 | 2 | 2 | 1 | 2 | 2 | 1  | 8   | 0    | 0,00                            | Large-artery Atherosclerosis    |
| 72 | 64 | P | 20,0 | 15 | N/A | Hypertension, dislipidemia                                               | 1 | 2 | 1 | 2 | 22 | 2 | 2 | 2 | 1 | 1 | 1 | 1 | 2 | 2 | 1 | 7  | 769 | 3,33 | Stroke of Undetermined Etiology |                                 |
| 73 | 44 | P | 24,0 | 8  | N/A | HR, dislipidemia                                                         | 1 | 2 | 1 | 2 | 2  | 2 | 2 | 2 | 1 | 2 | 2 | 2 | 1 | 2 | 2 | 8  | 0   | 0,00 | Small-artery occlusion          |                                 |
| 74 | 43 | L | 8,0  | 4  | 4   | Hypertension, Smoking, high risk OSA, dyslipidemia, hiperurisemia        | 1 | 2 | 1 | 1 | 1  | 2 | 2 | 2 | 2 | 2 | 2 | 2 | 1 | 2 | 2 | 6  | 0   | 0,00 | Small-artery occlusion          |                                 |
| 75 | 61 | L | 7,0  | 12 | 10  | Kelainan jantung                                                         | 1 | 2 | 1 | 2 | 2  | 2 | 2 | 2 | 2 | 2 | 2 | 1 | 2 | 2 | 1 | 10 | 0   | 0,00 | Stroke of Undetermined Etiology |                                 |

|    |    |   |      |    |   |                            |   |   |   |   |   |   |   |   |   |   |   |   |   |   |    |         |      |                        |                              |
|----|----|---|------|----|---|----------------------------|---|---|---|---|---|---|---|---|---|---|---|---|---|---|----|---------|------|------------------------|------------------------------|
| 76 | 75 | L | 24,0 | 12 | 2 | Hypertension, smoking      | 1 | 2 | 2 | 1 | 2 | 2 | 2 | 2 | 1 | 2 | 1 | 2 | 2 | 1 | 3  | 12 hari | 0    | 0,00                   | Large-artery Atherosclerosis |
| 77 | 75 | P | 3,0  | 19 | 7 | AF RVR                     | 2 | 2 | 2 | 2 | 2 | 1 | 2 | 2 | 1 | 2 | 2 | 1 | 2 | 2 | 1  | 35      | 0    | 0,00                   | cardioembolism               |
| 78 | 60 | P | 18,0 | 7  | 0 | Hypertension, dislipidemia | 1 | 2 | 1 | 2 | 2 | 2 | 2 | 2 | 2 | 1 | 2 | 1 | 2 | 2 | 12 | 351     | 0,57 | Small-artery occlusion |                              |

|    |    |   |       |    |     |                              |   |   |   |   |   |   |   |   |   |   |   |   |   |   |   |    |     |       |                                     |
|----|----|---|-------|----|-----|------------------------------|---|---|---|---|---|---|---|---|---|---|---|---|---|---|---|----|-----|-------|-------------------------------------|
| 79 | 71 | L | 7,0   | 16 | 16  | PVC frequent, hiperkoagulasi | 1 | 2 | 2 | 2 | 2 | 2 | 2 | 2 | 1 | 1 | 1 | 1 | 2 | 2 | 1 | 23 | 504 | 4,19  | Stroke of Undetermined Etiology     |
| 80 | 63 | L | 24,0  | 17 | N/A | Kelainan jantung             | 2 | 1 | 2 | 2 | 2 | 2 | 2 | 2 | 1 | 1 | 1 | 1 | 2 | 2 | 1 | 10 | 613 | 15,09 | Stroke of Undetermined Etiology     |
| 81 | 41 | P | 4,0   | 6  | 3   | Hiperkoagulasi               | 2 | 2 | 2 | 2 | 2 | 2 | 2 | 2 | 2 | 1 | 1 | 2 | 2 | 1 | 3 | 9  | 464 | 14,64 | stroke of other determined etiology |
| 82 | 67 | P | 6,0   | 13 | N/A | AF, HT, DM, hiperkoagulasi   | 1 | 1 | 2 | 2 | 2 | 1 | 2 | 2 | 2 | 1 | 1 | 1 | 2 | 2 | 1 | 5  | 671 | 5,12  | Stroke of Undetermined Etiology     |
| 83 | 69 | L | 6,0   | 13 | N/A | NSTEMI, hiperkoagulasi       | 2 | 2 | 2 | 2 | 2 | 2 | 1 | 2 | 1 | 1 | 1 | 1 | 2 | 2 | 1 | 4  | 340 | 17,90 | Stroke of Undetermined Etiology     |
| 84 | 70 | P | 120,0 | 17 | N/A | ACS, hiperkoagulasi          | 2 | 2 | 2 | 2 | 2 | 2 | 1 | 2 | 2 | 1 | 1 | 1 | 2 | 2 | 1 | 10 | 256 | 9,66  | Stroke of Undeter                   |



|    |    |   |      |    |     |                             |   |   |   |   |   |   |   |   |   |   |   |   |   |   |    |         |      |              |                                 |
|----|----|---|------|----|-----|-----------------------------|---|---|---|---|---|---|---|---|---|---|---|---|---|---|----|---------|------|--------------|---------------------------------|
| 87 | 56 | L | 96,0 | 17 | N/A | trombus ventrikel kiri, CAD | 2 | 2 | 2 | 2 | 2 | 2 | 2 | 1 | 2 | 2 | 2 | 1 | 2 | 2 | 1  | 10 hari | 0    | 0,00         | cardioembolism                  |
| 88 | 69 | L | 5,0  | 19 | 19  | AF NVR, hiperkoagulasi      | 2 | 2 | 2 | 2 | 2 | 1 | 2 | 2 | 1 | 1 | 1 | 1 | 2 | 2 | 1  | 4       | 421  | 6,18         | Stroke of Undetermined Etiology |
| 89 | 64 | L | 14,0 | 6  | 1   | Hypertension                | 1 | 2 | 2 | 2 | 2 | 2 | 2 | 2 | 2 | 2 | 2 | 1 | 2 | 2 | 13 | 0       | 0,00 | Small-artery |                                 |



|        |    |   |     |    |    |                   |   |   |   |   |   |   |   |   |   |   |   |   |   |   |   |    |   |          |                        |
|--------|----|---|-----|----|----|-------------------|---|---|---|---|---|---|---|---|---|---|---|---|---|---|---|----|---|----------|------------------------|
| 9<br>4 | 72 | L | 5,0 | 18 | 16 | Atrial<br>flutter | 2 | 2 | 2 | 2 | 2 | 1 | 2 | 2 | 1 | 2 | 2 | 1 | 2 | 2 | 1 | 11 | 0 | 0,0<br>0 | cardioe<br>mbolis<br>m |
|--------|----|---|-----|----|----|-------------------|---|---|---|---|---|---|---|---|---|---|---|---|---|---|---|----|---|----------|------------------------|

|        |    |   |          |    |     |                                                |   |   |   |   |   |   |   |   |   |   |   |   |   |   |   |   |     |          |                                              |
|--------|----|---|----------|----|-----|------------------------------------------------|---|---|---|---|---|---|---|---|---|---|---|---|---|---|---|---|-----|----------|----------------------------------------------|
| 9<br>5 | 43 | L | 10,<br>0 | 12 | N/A | AF RVR,<br>MS<br>severe,<br>hiperkoa<br>gulasi | 2 | 2 | 2 | 2 | 2 | 1 | 2 | 2 | 2 | 1 | 1 | 1 | 2 | 2 | 1 | 4 | 496 | 7,1<br>7 | Stroke<br>of<br>Undeter<br>mined<br>Etiology |
|--------|----|---|----------|----|-----|------------------------------------------------|---|---|---|---|---|---|---|---|---|---|---|---|---|---|---|---|-----|----------|----------------------------------------------|

|        |    |   |           |    |   |                                                   |   |   |   |   |   |   |   |   |   |   |   |   |   |   |   |   |   |          |                                         |
|--------|----|---|-----------|----|---|---------------------------------------------------|---|---|---|---|---|---|---|---|---|---|---|---|---|---|---|---|---|----------|-----------------------------------------|
| 9<br>6 | 59 | L | 504<br>,0 | 14 | 9 | Hyperten<br>sion,<br>smoking,<br>dislipide<br>mia | 1 | 2 | 1 | 1 | 2 | 2 | 2 | 2 | 1 | 2 | 2 | 1 | 2 | 2 | 1 | 7 | 0 | 0,0<br>0 | Large-<br>artery<br>Atheros<br>clerosis |
|--------|----|---|-----------|----|---|---------------------------------------------------|---|---|---|---|---|---|---|---|---|---|---|---|---|---|---|---|---|----------|-----------------------------------------|

|     |    |   |       |    |     |                                                  |   |   |   |   |   |   |   |   |   |   |   |   |   |   |   |    |     |       |                                 |
|-----|----|---|-------|----|-----|--------------------------------------------------|---|---|---|---|---|---|---|---|---|---|---|---|---|---|---|----|-----|-------|---------------------------------|
| 97  | 61 | P | 16,0  | 4  | 0   | Hypertension, DMT2, Dislipidemia                 | 1 | 1 | 1 | 2 | 2 | 2 | 2 | 2 | 2 | 2 | 2 | 2 | 1 | 2 | 2 | 7  | 0   | 0,00  | Small-artery occlusion          |
| 98  | 52 | L | 9,0   | 18 | 15  | HT, smoking, dislipidemia                        | 1 | 2 | 1 | 1 | 2 | 2 | 2 | 2 | 1 | 2 | 2 | 1 | 2 | 2 | 1 | 8  | 0   | 0,00  | Large-artery Atherosclerosis    |
| 99  | 63 | P | 72,0  | 17 | 0   | Hiperkoagulasi, Hypertension, dislipidemia, DMT2 | 1 | 1 | 1 | 2 | 2 | 2 | 2 | 2 | 2 | 1 | 1 | 2 | 1 | 2 | 2 | 29 | 413 | 31,46 | Stroke of Undetermined Etiology |
| 100 | 61 | L | 120,0 | 7  | N/A | Hypertension, dislipidemia                       | 1 | 2 | 1 | 2 | 2 | 2 | 2 | 2 | 2 | 2 | 2 | 2 | 1 | 2 | 2 | 10 | 0   | 0,00  | Small-artery occlusion          |
| 101 | 53 | L | 3,0   | 3  | N/A | Hypertension,                                    | 1 | 2 | 1 | 2 | 2 | 2 | 2 | 2 | 1 | 2 | 2 | 2 | 1 | 2 | 2 | 6  | 0   | 0,00  | Small-artery                    |



|     |    |   |     |    |     |               |   |   |   |   |   |   |   |   |   |   |   |   |   |   |   |   |   |          |                        |
|-----|----|---|-----|----|-----|---------------|---|---|---|---|---|---|---|---|---|---|---|---|---|---|---|---|---|----------|------------------------|
| 108 | 84 | P | 3,0 | 19 | 19  | AF, HT        | 1 | 2 | 2 | 2 | 2 | 1 | 2 | 2 | 2 | 2 | 2 | 1 | 2 | 2 | 1 | 7 | 0 | 0,0<br>0 | cardioe<br>mbolis<br>m |
| 109 | 59 | P | 2,0 | 16 | N/A | AF NVR,<br>HT | 1 | 2 | 2 | 2 | 2 | 1 | 2 | 2 | 2 | 2 | 2 | 1 | 2 | 2 | 1 | 2 | 0 | 0,0<br>0 | cardioe<br>mbolis<br>m |

|             |    |   |          |   |     |                                                   |   |   |   |   |   |   |   |   |   |   |   |   |   |   |   |   |          |                                         |
|-------------|----|---|----------|---|-----|---------------------------------------------------|---|---|---|---|---|---|---|---|---|---|---|---|---|---|---|---|----------|-----------------------------------------|
| 1<br>1<br>0 | 29 | P | 12,<br>0 | 9 | N/A | Hyperten<br>sion,<br>dislipide<br>mia             | 1 | 2 | 1 | 2 | 2 | 2 | 2 | 2 | 2 | 2 | 1 | 2 | 2 | 1 | 4 | 0 | 0,0<br>0 | Large-<br>artery<br>Atheros<br>clerosis |
| 1<br>1<br>1 | 63 | P | 84,<br>0 | 5 | 1   | Smoking                                           | 2 | 2 | 2 | 1 | 2 | 2 | 2 | 2 | 2 | 2 | 2 | 2 | 1 | 3 | 8 | 0 | 0,0<br>0 | Small-<br>artery<br>occlusio<br>n       |
| 1<br>1<br>2 | 56 | L | 4,5      | 8 | N/A | Hyperten<br>sion,<br>smoking,<br>dislipide<br>mia | 1 | 2 | 1 | 1 | 2 | 2 | 2 | 2 | 2 | 2 | 1 | 2 | 2 | 1 | 7 | 0 | 0,0<br>0 | Large-<br>artery<br>Atheros<br>clerosis |

|             |    |   |          |   |     |                                               |   |   |   |   |   |   |   |   |   |   |   |   |   |   |   |   |   |          |                                   |
|-------------|----|---|----------|---|-----|-----------------------------------------------|---|---|---|---|---|---|---|---|---|---|---|---|---|---|---|---|---|----------|-----------------------------------|
| 1<br>1<br>3 | 70 | L | 96,<br>0 | 4 | N/A | Hyperten<br>sion,<br>stroke<br>sebelumn<br>ya | 1 | 2 | 2 | 2 | 2 | 2 | 2 | 2 | 1 | 2 | 2 | 2 | 1 | 2 | 2 | 4 | 0 | 0,0<br>0 | Small-<br>artery<br>occlusio<br>n |
|-------------|----|---|----------|---|-----|-----------------------------------------------|---|---|---|---|---|---|---|---|---|---|---|---|---|---|---|---|---|----------|-----------------------------------|

|             |    |   |          |    |     |                               |   |   |   |   |   |   |   |   |   |   |   |   |   |   |   |    |          |                                         |                        |
|-------------|----|---|----------|----|-----|-------------------------------|---|---|---|---|---|---|---|---|---|---|---|---|---|---|---|----|----------|-----------------------------------------|------------------------|
| 1<br>1<br>4 | 53 | P | 48,<br>0 | 20 | N/A | LVH<br>Concentri<br>c, HT, DM | 1 | 1 | 2 | 2 | 2 | 2 | 2 | 2 | 1 | 2 | 2 | 1 | 2 | 2 | 1 | 10 | 0        | 0,0<br>0                                | cardioe<br>mbolis<br>m |
| 1<br>1<br>5 | 70 | L | 16,<br>0 | 12 | N/A | Hyperten<br>sion              | 1 | 2 | 2 | 2 | 2 | 2 | 2 | 2 | 2 | 2 | 1 | 2 | 2 | 1 | 2 | 0  | 0,0<br>0 | Large-<br>artery<br>Atheros<br>clerosis |                        |

|     |    |   |      |    |     |                                                         |   |   |   |   |   |   |   |   |   |   |   |   |   |   |   |   |   |      |                        |
|-----|----|---|------|----|-----|---------------------------------------------------------|---|---|---|---|---|---|---|---|---|---|---|---|---|---|---|---|---|------|------------------------|
| 116 | 64 | L | 6,0  | 8  | N/A | Hypertension                                            | 1 | 2 | 2 | 2 | 2 | 2 | 2 | 2 | 2 | 2 | 2 | 2 | 1 | 2 | 2 | 5 | 0 | 0,00 | Small-artery occlusion |
| 117 | 37 | P | 0,5  | 12 | 5   | AF NVR, Rheumatic Heart Disease                         | 2 | 2 | 2 | 2 | 2 | 1 | 2 | 1 | 2 | 2 | 2 | 1 | 2 | 2 | 1 | 7 | 0 | 0,00 | cardioembolism         |
| 118 | 79 | L | 24,0 | 4  | 2   | Hypertension, DM, dyslipidemia, stroke ulang sebelumnya | 1 | 1 | 1 | 2 | 2 | 2 | 2 | 2 | 1 | 2 | 2 | 2 | 1 | 2 | 2 | 4 | 0 | 0,00 | Small-artery occlusion |

|     |    |   |      |    |     |                                           |   |   |   |   |   |   |   |   |   |   |   |   |   |   |   |   |      |                              |                        |
|-----|----|---|------|----|-----|-------------------------------------------|---|---|---|---|---|---|---|---|---|---|---|---|---|---|---|---|------|------------------------------|------------------------|
| 119 | 56 | L | 2,0  | 14 | 11  | Hypertension, Dislipidemia                | 1 | 2 | 1 | 2 | 2 | 2 | 2 | 2 | 2 | 2 | 1 | 2 | 2 | 1 | 8 | 0 | 0,00 | Large-artery Atherosclerosis |                        |
| 120 | 64 | L | 72,0 | 4  | N/A | Hypertension, DM, Dislipidemia, smoking   | 1 | 1 | 1 | 1 | 2 | 2 | 2 | 2 | 1 | 2 | 2 | 2 | 1 | 2 | 2 | 7 | 0    | 0,00                         | Small-artery occlusion |
| 121 | 35 | L | 3,5  | 7  | 4   | Hypertension, DMT2, Smoking, dislipidemia | 1 | 1 | 1 | 1 | 2 | 2 | 2 | 2 | 2 | 2 | 1 | 2 | 2 | 1 | 7 | 0 | 0,00 | Large-artery Atherosclerosis |                        |

|             |    |   |          |    |     |                                                 |   |   |   |   |   |   |   |   |   |   |   |   |   |   |    |   |          |                                   |                                         |
|-------------|----|---|----------|----|-----|-------------------------------------------------|---|---|---|---|---|---|---|---|---|---|---|---|---|---|----|---|----------|-----------------------------------|-----------------------------------------|
| 1<br>2<br>2 | 62 | P | 10,<br>0 | 11 | N/A | kelainan<br>jantung,<br>HT,<br>Dislipide<br>mia | 1 | 2 | 1 | 2 | 2 | 2 | 2 | 2 | 2 | 2 | 1 | 2 | 2 | 1 | 5  | 0 | 0,0<br>0 | cardioe<br>mbolis<br>m            |                                         |
| 1<br>2<br>3 | 73 | L | 24,<br>0 | 10 | N/A | Hyperten<br>sion,<br>dislipide<br>mia           | 1 | 2 | 1 | 2 | 2 | 2 | 2 | 2 | 1 | 2 | 2 | 1 | 2 | 2 | 1  | 9 | 0        | 0,0<br>0                          | Large-<br>artery<br>Atheros<br>clerosis |
| 1<br>2<br>4 | 63 | P | 24,<br>0 | 28 | 24  | Hyperten<br>sion,<br>DMT2,                      | 1 | 1 | 1 | 2 | 2 | 2 | 2 | 2 | 2 | 2 | 2 | 2 | 1 | 3 | 12 | 0 | 0,0<br>0 | Small-<br>artery<br>occlusio<br>n |                                         |

|             |    |   |     |    |   |                                                                      |   |   |   |   |   |   |   |   |   |   |   |   |   |   |   |    |   |          |                                 |
|-------------|----|---|-----|----|---|----------------------------------------------------------------------|---|---|---|---|---|---|---|---|---|---|---|---|---|---|---|----|---|----------|---------------------------------|
| 1<br>2<br>5 | 54 | L | 7,0 | 14 | 0 | dislipidemia<br><br>Hypertension, smoking dan stroke sebelumnya, HCM | 1 | 2 | 2 | 1 | 2 | 2 | 2 | 1 | 1 | 2 | 2 | 1 | 2 | 2 | 1 | 5  | 0 | 0,0<br>0 | cardioembolism                  |
| 1<br>2<br>6 | 65 | L | 6,0 | 15 | 6 | AF, LA thrombus, plak tipe II-III difus >50L, HT, DM, Dislipidemia   | 1 | 1 | 1 | 2 | 2 | 1 | 2 | 2 | 1 | 2 | 2 | 1 | 2 | 2 | 1 | 10 | 0 | 0,0<br>0 | Stroke of Undetermined Etiology |

|             |    |   |          |    |     |                                                   |   |   |   |   |   |   |   |   |   |   |   |   |   |   |   |   |   |          |                                         |
|-------------|----|---|----------|----|-----|---------------------------------------------------|---|---|---|---|---|---|---|---|---|---|---|---|---|---|---|---|---|----------|-----------------------------------------|
| 1<br>2<br>7 | 76 | L | 24,<br>0 | 8  | 5   | AF RVR,<br>CHF, HT,<br>DM,<br>dislipide<br>mia,   | 1 | 1 | 1 | 2 | 2 | 1 | 2 | 1 | 1 | 2 | 2 | 1 | 2 | 2 | 1 | 9 | 0 | 0,0<br>0 | cardioe<br>mbolis<br>m                  |
| 1<br>2<br>8 | 55 | L | 5,0      | 16 | 0   | Hyperten<br>sion,<br>smoking                      | 1 | 2 | 2 | 1 | 2 | 2 | 2 | 2 | 2 | 2 | 2 | 1 | 2 | 2 | 1 | 2 | 0 | 0,0<br>0 | Large-<br>artery<br>Atheros<br>clerosis |
| 1<br>2<br>9 | 63 | P | 8,0      | 16 | 0   | Hyperten<br>sion                                  | 1 | 2 | 2 | 2 | 2 | 2 | 2 | 2 | 2 | 2 | 2 | 2 | 1 | 2 | 2 | 9 | 0 | 0,0<br>0 | Small-<br>artery<br>occlusio<br>n       |
| 1<br>3<br>0 | 52 | L | 5,0      | 4  | N/A | Hyperten<br>sion,<br>dislipide<br>mia,<br>smoking | 1 | 2 | 1 | 1 | 2 | 2 | 2 | 2 | 2 | 2 | 2 | 2 | 1 | 2 | 2 | 6 | 0 | 0,0<br>0 | Small-<br>artery<br>occlusio<br>n       |
| 1<br>3<br>1 | 71 | P | 16,<br>0 | 18 | 0   | AF NVR,<br>Hyperten<br>sion,<br>Dislipide<br>mia  | 1 | 2 | 1 | 2 | 2 | 1 | 2 | 2 | 1 | 2 | 2 | 1 | 2 | 2 | 1 | 4 | 0 | 0,0<br>0 | cardioe<br>mbolis<br>m                  |

|             |    |   |          |    |     |                                                   |   |   |   |   |   |   |   |   |   |   |   |   |   |   |   |   |    |          |                                         |                                         |
|-------------|----|---|----------|----|-----|---------------------------------------------------|---|---|---|---|---|---|---|---|---|---|---|---|---|---|---|---|----|----------|-----------------------------------------|-----------------------------------------|
| 1<br>3<br>2 | 65 | P | 10,<br>0 | 9  | 7   | Hyperten<br>sion,<br>DMT2,<br>Dislipide<br>mia    | 1 | 1 | 1 | 2 | 2 | 2 | 2 | 2 | 2 | 1 | 2 | 2 | 1 | 2 | 2 | 1 | 10 | 0        | 0,0<br>0                                | Large-<br>artery<br>Atheros<br>clerosis |
| 1<br>3<br>3 | 63 | P | 24,<br>0 | 13 | N/A | Hyperten<br>sion                                  | 1 | 2 | 1 | 2 | 2 | 2 | 2 | 2 | 2 | 2 | 2 | 2 | 1 | 2 | 2 | 2 | 3  | 0        | 0,0<br>0                                | Small-<br>artery<br>occlusio<br>n       |
| 1<br>3<br>4 | 54 | L | 7,0      | 6  | N/A | Hyperten<br>sion,<br>Dislipide<br>mia,<br>Smoking | 1 | 2 | 1 | 1 | 2 | 2 | 2 | 2 | 1 | 2 | 2 | 2 | 1 | 2 | 2 | 2 | 6  | 0        | 0,0<br>0                                | Small-<br>artery<br>occlusio<br>n       |
| 1<br>3<br>5 | 65 | L | 5,0      | 10 | 3   | Hyperten<br>sion,<br>dislipide<br>mia,<br>smoking | 1 | 2 | 1 | 1 | 2 | 2 | 2 | 2 | 1 | 2 | 2 | 1 | 2 | 2 | 1 | 6 | 0  | 0,0<br>0 | Large-<br>artery<br>Atheros<br>clerosis |                                         |
| 1<br>3<br>6 | 59 | L | 6,0      | 7  | N/A | Hyperten<br>sion,<br>DMT2,<br>dislipide<br>mia    | 1 | 1 | 1 | 2 | 2 | 2 | 2 | 2 | 2 | 2 | 2 | 1 | 2 | 2 | 1 | 9 | 0  | 0,0<br>0 | Large-<br>artery<br>Atheros<br>clerosis |                                         |
